# Supplementary material for: Electronic structure and ultrafast charge transfer dynamics of phosphorous doped graphene layers on a copper substrate: a combined spectroscopic study
Source: Royal Society of Chemistry journal article supplement (doi:10.1039/c5ra12799h), 2015-01-01
Supplement: c5ra12799h1.pdf [file c5ra12799h1.pdf]

## **Supplementary Information File**

### **Electronic structure and ultrafast charge transfer dynamics of phosphorous doped graphene layers on copper substrate: A combined spectroscopic study**

Dunieskys Gonzalez Larrude,<sup>a,b</sup> Yunier Garcia-Basabe,<sup>c,d\*</sup>, Fernando Lázaro Freire Junior,<sup>b,e</sup> Maria Luiza M. Rocco<sup>c</sup>.

<sup>a</sup> *Graphene and Nano-materials Research Center - MackGraphe, Mackenzie*

*Presbyterian University, 01302-907, São Paulo, SP, Brazil.*

<sup>b</sup> *Physics Department, Pontifícia Universidade Católica do Rio de Janeiro, 22451-900, Rio de Janeiro, RJ, Brazil.*

<sup>c</sup> *Institute of Chemistry, Federal University of Rio de Janeiro, Rio de Janeiro, 21941-909, Brazil.*

<sup>d</sup> *Federal University of Latin-American Integration, Foz do Iguaçu, 85866-000, PR, Brazil.*

<sup>e</sup> *Brazilian Center for Physical Research, 22290-180, Rio de Janeiro, RJ, Brazil.*

\*Corresponding author. Tel.: +55-45-3576-2113; Fax: +55-21-3938-7265.

E-mail address: yunier.basabe@unila.edu.br (Y. Garcia-Basabe).

This Supporting Information is composed by one section:

1. Equation for quantification of the phosphorous element in GP/Cu graphene.
2. Supporting Figures (Figure SI1).

## Figure Captions

**Figure SI1.** High resolution P2p XPS spectrum of GP/Cu (right) graphene layer. The two features used in the fitting procedure are also shown.

**Equation for quantification of the phosphorous element amount in GP/Cu graphene.**

The amount of P in the graphene film is determined from high resolution P 2p show in Figure SI1 and using the following equation.

$$X_i = 100(A_i) / \left( \sum_j^m A_j \right)$$

The  $A_i$  represents the peak intensity in this case corresponding to P 2p XPS spectrum.

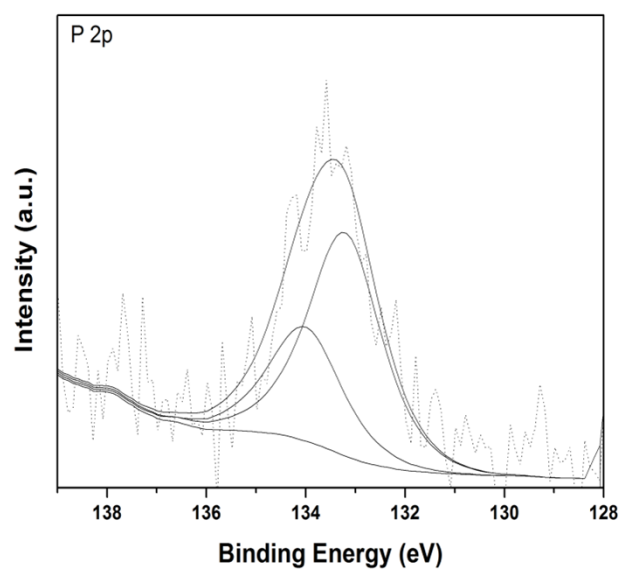

**Figure S11.** High resolution P2p XPS spectrum of GP/Cu (right) graphene layer. The two features used in the fitting procedure are also shown.
